# Supplementary material
Source: Research Square preprint supplement (doi:10.21203/rs.3.rs-9598317/v1)
Supplement: Supplementary file 2 [file e97222010eac8248c15f18e5.pdf]

## Supplemental tables

**Supplementary Table 1: Genome assembly statistics**

| step                    | # scaffolds | N50, Kb | % gap | BUSCO                                          |
|-------------------------|-------------|---------|-------|------------------------------------------------|
| 10xGenomics, Supernova2 | 174165      | 33.877  | 3.073 | C:62.9%[S:56.0%,D:6.9%],F:21.0%,M:16.1%,n:3950 |
| Agouti with RNAseq      | 171284      | 35.23   | 8.804 | C:64.7%[S:58.2%,D:6.5%],F:19.2%,M:16.1%,n:3950 |
| Jelly on Nanopore       | 163793      | 40.024  | 7.147 | C:67.6%[S:61.4%,D:6.2%],F:17.9%,M:14.5%,n:3950 |
| Dovetail                | 39223       | 227.932 |       | C:78.6%[S:73.7%,D:4.9%],F:6.4%,M:15.0%,n:5310  |

**Supplementary Table 2: Transcriptome assembly statistics**

| sample | organ   | # raw reads | # transcripts | # transcripts_1tpm_cutoff | after cdhit |
|--------|---------|-------------|---------------|---------------------------|-------------|
| AK393  | stomach | 101,419,756 | 211105        | 61363                     | 53092       |
| AK4334 | lung    | 99,048,832  | 246972        | 86823                     | 73408       |
| AK2340 | skin    | 155,144,638 | 290666        | 84145                     | 71437       |
| AK3438 | eye     | 151,860,400 | 364970        | 88779                     | 76814       |
| AK626  | brain   | 142,942,536 | 621519        | 169862                    | 152663      |
| merged | -       | -           | -             | 490972                    | 228525      |

**Supplementary Table 3: Gene family expansion/contraction**

[https://figshare.com/articles/dataset/Changes in cell cycle machinery as genetic basis for polyploidy stabilization in Australian burrowing frogs Neobatrachus /30576644?file=59724149](https://figshare.com/articles/dataset/Changes_in_cell_cycle_machinery_as_genetic_basis_for_polyploidy_stabilization_in_Australian_burrowing_frogs_Neobatrachus_/30576644?file=59724149)

**Supplementary Table 4: Sample overview**

[https://figshare.com/articles/dataset/Changes in cell cycle machinery as genetic basis for polyploidy stabilization in Australian burrowing frogs Neobatrachus /30576644?file=59724158](https://figshare.com/articles/dataset/Changes_in_cell_cycle_machinery_as_genetic_basis_for_polyploidy_stabilization_in_Australian_burrowing_frogs_Neobatrachus_/30576644?file=59724158)

**Supplementary Table 5: ABBA-BABA statistics**

| D         | JK.D      | V.JK.D.  | Z          | pvalue | nABBA       | nBABA       | nBlocks | H1       | H2         | H3             | H4         |
|-----------|-----------|----------|------------|--------|-------------|-------------|---------|----------|------------|----------------|------------|
| -0.226253 | -0.226253 | 8.00E-06 | -78.910464 | 0      | 46711.21526 | 74029.13753 | 386     | Nfulvus  | Npictus    | Nalbipes       | Ldumerilli |
| 0.109512  | 0.109512  | 1.00E-05 | 34.945628  | 0      | 69308.81975 | 55626.91236 | 386     | Nsutor   | Nwilsmorei | Nalbipes       | Ldumerilli |
| 0.085891  | 0.085891  | 1.90E-05 | 19.680214  | 0      | 74707.59391 | 62889.27748 | 386     | Nalbipes | Nsutor     | Nfulvus        | Ldumerilli |
| 0.034171  | 0.034171  | 1.20E-05 | 9.873014   | 0      | 63918.33891 | 59694.3127  | 386     | Nalbipes | Nwilsmorei | Nfulvus        | Ldumerilli |
| -0.065735 | -0.065735 | 1.30E-05 | -18.474778 | 0      | 50271.91652 | 57346.16222 | 386     | Nsutor   | Nwilsmorei | Nfulvus        | Ldumerilli |
| -0.258839 | -0.258839 | 8.00E-06 | -89.660025 | 0      | 51184.83882 | 86935.81157 | 386     | Nalbipes | Nfulvus    | Npelobatooides | Ldumerilli |

|           |           |          |             |       |             |             |     |          |            |                |            |
|-----------|-----------|----------|-------------|-------|-------------|-------------|-----|----------|------------|----------------|------------|
| -0.393355 | -0.393355 | 6.00E-06 | -161.085107 | 0     | 46429.20843 | 106639.465  | 386 | Nalbipes | Npictus    | Npelobatooides | Ldumerilli |
| -0.112212 | -0.112212 | 9.00E-06 | -36.556505  | 0     | 58208.06246 | 72922.46474 | 386 | Nalbipes | Nsutor     | Npelobatooides | Ldumerilli |
| -0.068212 | -0.068212 | 1.00E-05 | -21.302818  | 0     | 56950.80332 | 65289.03872 | 386 | Nalbipes | Nwilsmorei | Npelobatooides | Ldumerilli |
| -0.210298 | -0.210298 | 8.00E-06 | -75.783093  | 0     | 43114.9258  | 66077.92321 | 386 | Nfulvus  | Npictus    | Npelobatooides | Ldumerilli |
| 0.155947  | 0.155947  | 1.30E-05 | 43.539373   | 0     | 77534.6372  | 56614.53315 | 386 | Nfulvus  | Nsutor     | Npelobatooides | Ldumerilli |
| 0.195389  | 0.195389  | 1.20E-05 | 55.585044   | 0     | 80246.52704 | 54013.6124  | 386 | Nfulvus  | Nwilsmorei | Npelobatooides | Ldumerilli |
| 0.295672  | 0.295672  | 8.00E-06 | 102.027653  | 0     | 97668.57858 | 53092.66628 | 386 | Npictus  | Nsutor     | Npelobatooides | Ldumerilli |
| 0.325074  | 0.325074  | 8.00E-06 | 113.067445  | 0     | 98769.93356 | 50308.44571 | 386 | Npictus  | Nwilsmorei | Npelobatooides | Ldumerilli |
| 0.056898  | 0.056898  | 8.00E-06 | 20.766556   | 0     | 54382.79289 | 48527.41263 | 386 | Nsutor   | Nwilsmorei | Npelobatooides | Ldumerilli |
| 0.023321  | 0.023321  | 1.70E-05 | 5.697195    | 0     | 60889.18677 | 58113.97111 | 386 | Nalbipes | Nsutor     | Npictus        | Ldumerilli |
| 4.00E-04  | 4.00E-04  | 1.20E-05 | 0.116023    | 0.907 | 54703.23753 | 54659.51581 | 386 | Nalbipes | Nwilsmorei | Npictus        | Ldumerilli |
| -0.030258 | -0.030258 | 1.20E-05 | -8.561145   | 0     | 44947.39298 | 47752.28171 | 386 | Nsutor   | Nwilsmorei | Npictus        | Ldumerilli |
| -0.281701 | -0.281701 | 8.00E-06 | -101.132443 | 0     | 46440.85217 | 82866.92962 | 386 | Nfulvus  | Npictus    | Nsutor         | Ldumerilli |
| -0.246299 | -0.246299 | 8.00E-06 | -89.452657  | 0     | 45067.07887 | 74521.65282 | 386 | Nfulvus  | Npictus    | Nwilsmorei     | Ldumerilli |

**Supplementary Table 6:** Pseudohaplotype assignments of tetraploids to the diploid species of origin

| Nkunapalari       |                   |            |                    |                    |  |
|-------------------|-------------------|------------|--------------------|--------------------|--|
| pseudohaplotype 1 | pseudohaplotype 2 | occurrence | occurrence / total | occurrence / known |  |
| Npictus           | Npictus           | 14         | 0,00475            | 0,010550113        |  |
| Nalbipes          | Nfulvus           | 721        | 0,24457            | 0,543330821        |  |
| Nalbipes          | Nalbipes          | 211        | 0,07157            | 0,159005275        |  |
| Nalbipes          | Nwilsmorei        | 26         | 0,00882            | 0,019593067        |  |
| Nalbipes          | Nsutor            | 122        | 0,04138            | 0,091936699        |  |
| Nfulvus           | Npictus           | 6          | 0,00204            | 0,004521477        |  |
| Nalbipes          | Npictus           | 136        | 0,04613            | 0,102486812        |  |
| Nfulvus           | Nfulvus           | 13         | 0,00441            | 0,009796534        |  |
| Npelobatooides    | Npictus           | 2          | 0,00068            | 0,001507159        |  |
| Npelobatooides    | Npelobatooides    | 7          | 0,00237            | 0,005275057        |  |
| Nsutor            | Nsutor            | 21         | 0,00712            | 0,01582517         |  |
| Npictus           | Nsutor            | 11         | 0,00373            | 0,008289375        |  |
| Nsutor            | Nwilsmorei        | 13         | 0,00441            | 0,009796534        |  |
| Npictus           | Nwilsmorei        | 3          | 0,00102            | 0,002260739        |  |
| Nalbipes          | Npelobatooides    | 2          | 0,00068            | 0,001507159        |  |
| Nwilsmorei        | Nwilsmorei        | 1          | 0,00034            | 0,00075358         |  |
| Nfulvus           | Nsutor            | 14         | 0,00475            | 0,010550113        |  |

|         |            |      |         |             |
|---------|------------|------|---------|-------------|
| Nfulvus | Nwilsmorei | 4    | 0,00136 | 0,003014318 |
| unknown |            | 1621 | 0,54986 |             |
| known   |            | 1327 | 0,45014 |             |
| total   |            | 2948 | 1,00000 |             |

Nsudellae

| pseudohaplotype 1 | pseudohaplotype 2 | occurrence | occurrence / total | occurrence / known |
|-------------------|-------------------|------------|--------------------|--------------------|
| Nfulvus           | Nsutor            | 21         | 0,00560            | 0,009446694        |
| Nfulvus           | Nfulvus           | 1691       | 0,45069            | 0,760683761        |
| Nfulvus           | Npictus           | 76         | 0,02026            | 0,034188034        |
| Npictus           | Npictus           | 331        | 0,08822            | 0,148897886        |
| Nsutor            | Nsutor            | 65         | 0,01732            | 0,029239766        |
| Npictus           | Nsutor            | 8          | 0,00213            | 0,00359874         |
| Nalbipes          | Nalbipes          | 17         | 0,00453            | 0,007647323        |
| Npelobatoides     | Npictus           | 5          | 0,00133            | 0,002249213        |
| Npelobatoides     | Npelobatoides     | 3          | 0,00080            | 0,001349528        |
| Nalbipes          | Npictus           | 2          | 0,00053            | 0,000899685        |
| Nwilsmorei        | Nwilsmorei        | 2          | 0,00053            | 0,000899685        |
| Nalbipes          | Nfulvus           | 1          | 0,00027            | 0,000449843        |
| Nfulvus           | Npelobatoides     | 1          | 0,00027            | 0,000449843        |
|                   | unknown           | 1529       | 0,40752            |                    |
|                   | known             | 2223       | 0,59248            |                    |
|                   | total             | 3752       | 1,00000            |                    |

Naqulonius

| pseudohaplotype 1 | pseudohaplotype 2 | occurrence | occurrence / total | occurrence / known |
|-------------------|-------------------|------------|--------------------|--------------------|
| Nfulvus           | Npictus           | 42         | 0,02238806         | 0,032735776        |

|          |            |      |             |             |
|----------|------------|------|-------------|-------------|
| Nfulvus  | Nfulvus    | 1069 | 0,569829424 | 0,833203429 |
| Nalbipes | Nfulvus    | 1    | 0,000533049 | 0,000779423 |
| Npictus  | Nsutor     | 10   | 0,00533049  | 0,007794232 |
| Nfulvus  | Nsutor     | 113  | 0,060234542 | 0,088074825 |
| Nfulvus  | Nwilsmorei | 4    | 0,002132196 | 0,003117693 |
| Npictus  | Npictus    | 19   | 0,010127932 | 0,014809041 |
| Nsutor   | Nsutor     | 17   | 0,009061834 | 0,013250195 |
| Nalbipes | Nwilsmorei | 1    | 0,000533049 | 0,000779423 |
| Nalbipes | Nsutor     | 1    | 0,000533049 | 0,000779423 |
| Nsutor   | Nwilsmorei | 4    | 0,002132196 | 0,003117693 |
| Nalbipes | Nalbipes   | 2    | 0,001066098 | 0,001558846 |
|          | unknown    | 593  | 0,316098081 |             |
|          | known      | 1283 | 0,683901919 |             |
|          | total      | 1876 | 1           |             |

### Supplementary Table 7:

[https://figshare.com/articles/dataset/Changes\\_in\\_cell\\_cycle\\_machinery\\_as\\_genetic\\_basis\\_for\\_polyploid\\_stabilization\\_in\\_Australian\\_burrowing\\_frogs\\_Neobatrachus\\_/30576644?file=60781930](https://figshare.com/articles/dataset/Changes_in_cell_cycle_machinery_as_genetic_basis_for_polyploid_stabilization_in_Australian_burrowing_frogs_Neobatrachus_/30576644?file=60781930)

### Supplementary Table 8: Annotated genes that were under selection in all three tetraploid species.

| Functional group       | Gene   | Annotation                     | GO category                                                                |
|------------------------|--------|--------------------------------|----------------------------------------------------------------------------|
| Crossover interference | g5917  | SYCE2                          | synaptonemal complex assembly, structural unit of the synaptonemal complex |
|                        | g5068  | Proline-rich protein 19        | –                                                                          |
| Chromosome packaging   | g23417 | Condensin-2 complex subunit D3 | nuclear condensin complex, mitotic chromosome condensation                 |
|                        | g16961 | Histone H2A                    | nucleosome, protein heterodimerization activity, DNA binding               |
|                        | g5964  | Histone H2B                    | nucleosome, protein heterodimerization activity, DNA binding               |
|                        | g5970  | Histone H3/CENP-A              | nucleosome, protein                                                        |

|                         |        |                                                                 |                                                 |
|-------------------------|--------|-----------------------------------------------------------------|-------------------------------------------------|
|                         |        |                                                                 | heterodimerization activity, DNA binding        |
| <b>Spindle assembly</b> | g2400  | Kinesin-14 motor protein KifC1                                  | DNA binding                                     |
|                         | g11479 | Tetratricopeptide repeat protein 34                             |                                                 |
| <b>Other</b>            | g1430  | Pancreatic trypsin inhibitor Kunitz domain                      | serine-type endopeptidase inhibitor activity    |
|                         | g1431  | Lipocalin/cytosolic fatty-acid binding domain                   | small molecule binding                          |
|                         | g1506  | Allograft inflammatory factor 1                                 |                                                 |
|                         | g22785 | TAF1D                                                           | RNA polymerase transcription factor SL1 complex |
|                         | g23303 | EMI domain profile                                              |                                                 |
|                         | g23322 | BolA protein                                                    |                                                 |
|                         | g23338 | Iodothyronine deiodinase                                        | thyroxine 5'-deiodinase activity                |
|                         | g23627 | 1-phosphatidylinositol 4,5-bisphosphate phosphodiesterase eta-1 | phosphatidylinositol-mediated signaling         |
|                         | g9063  | Glycosyl transferase, family 3                                  | galactosyltransferase activity                  |

**Supplementary Table 9:** Introgression genes among tetraploid species.

[https://figshare.com/articles/dataset/Changes in cell cycle machinery as genetic basis for ployploidy stabilization in Australian burrowing frogs Neobatrachus /30576644?file=63103585](https://figshare.com/articles/dataset/Changes_in_cell_cycle_machinery_as_genetic_basis_for_ployploidy_stabilization_in_Australian_burrowing_frogs_Neobatrachus_/30576644?file=63103585)

## Supplemental figures

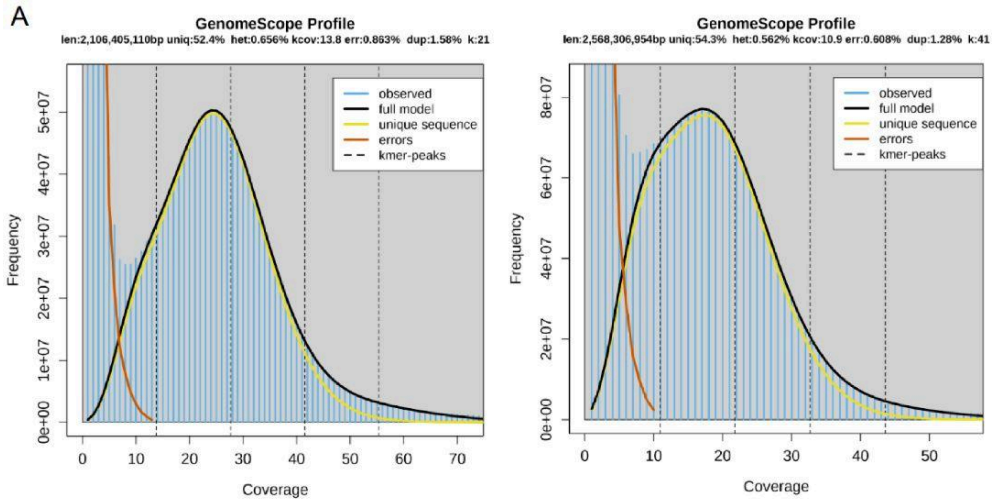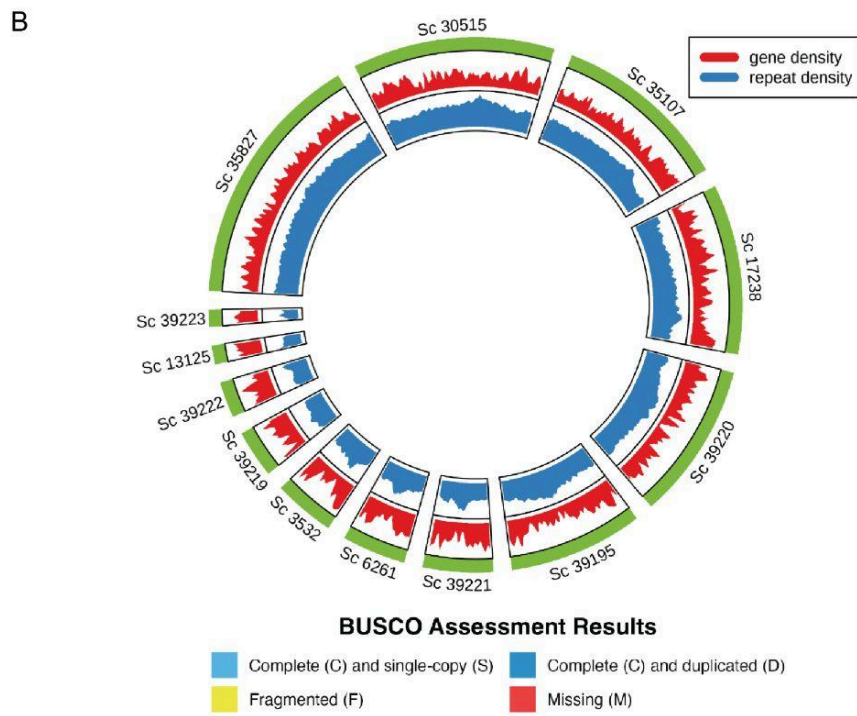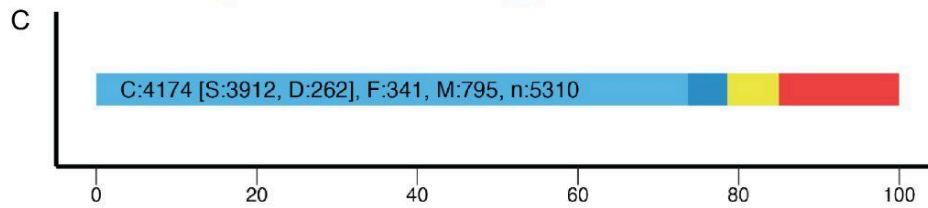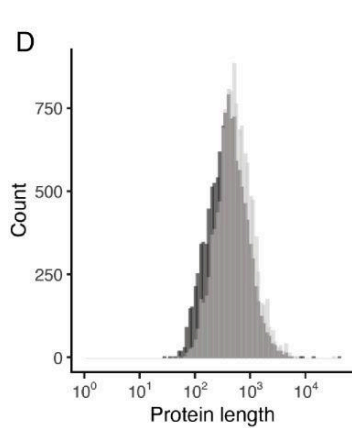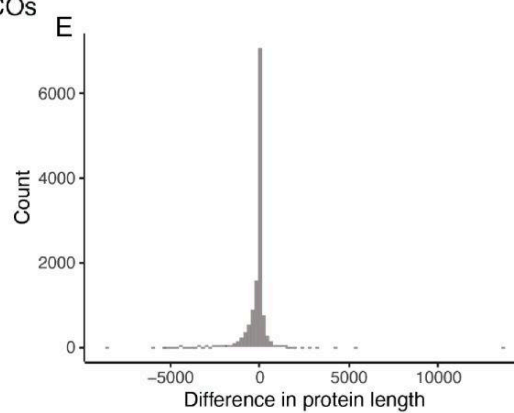

**Supplementary Figure 1. A** Genome size estimation of *N. pictus* based on k-mer histograms generated by JellyFish. Estimated genome size ranges from 2,106,405,110 to 2,568,306,954 (k-mer = 21-41). Estimation by Genomescope with k-mer = 21 (left) and k-mer = 41 (right). **B.** Gene and repeat density along the 13 biggest scaffolds of *N. pictus*. **C.** BUSCO Assessment results of the assembly of *N. pictus*. **D.** Protein length distribution of *N. pictus* and *X. tropicalis*. **E.** Comparison of protein length of *N. pictus* and *X. tropicalis*. Performed by blastp analysis of *N. pictus* against *X. tropicalis*. Proteins were filtered for  $evalue < 0.0001$  and  $pident > 0.7$ , retaining 12451 of the original 22811 hits.

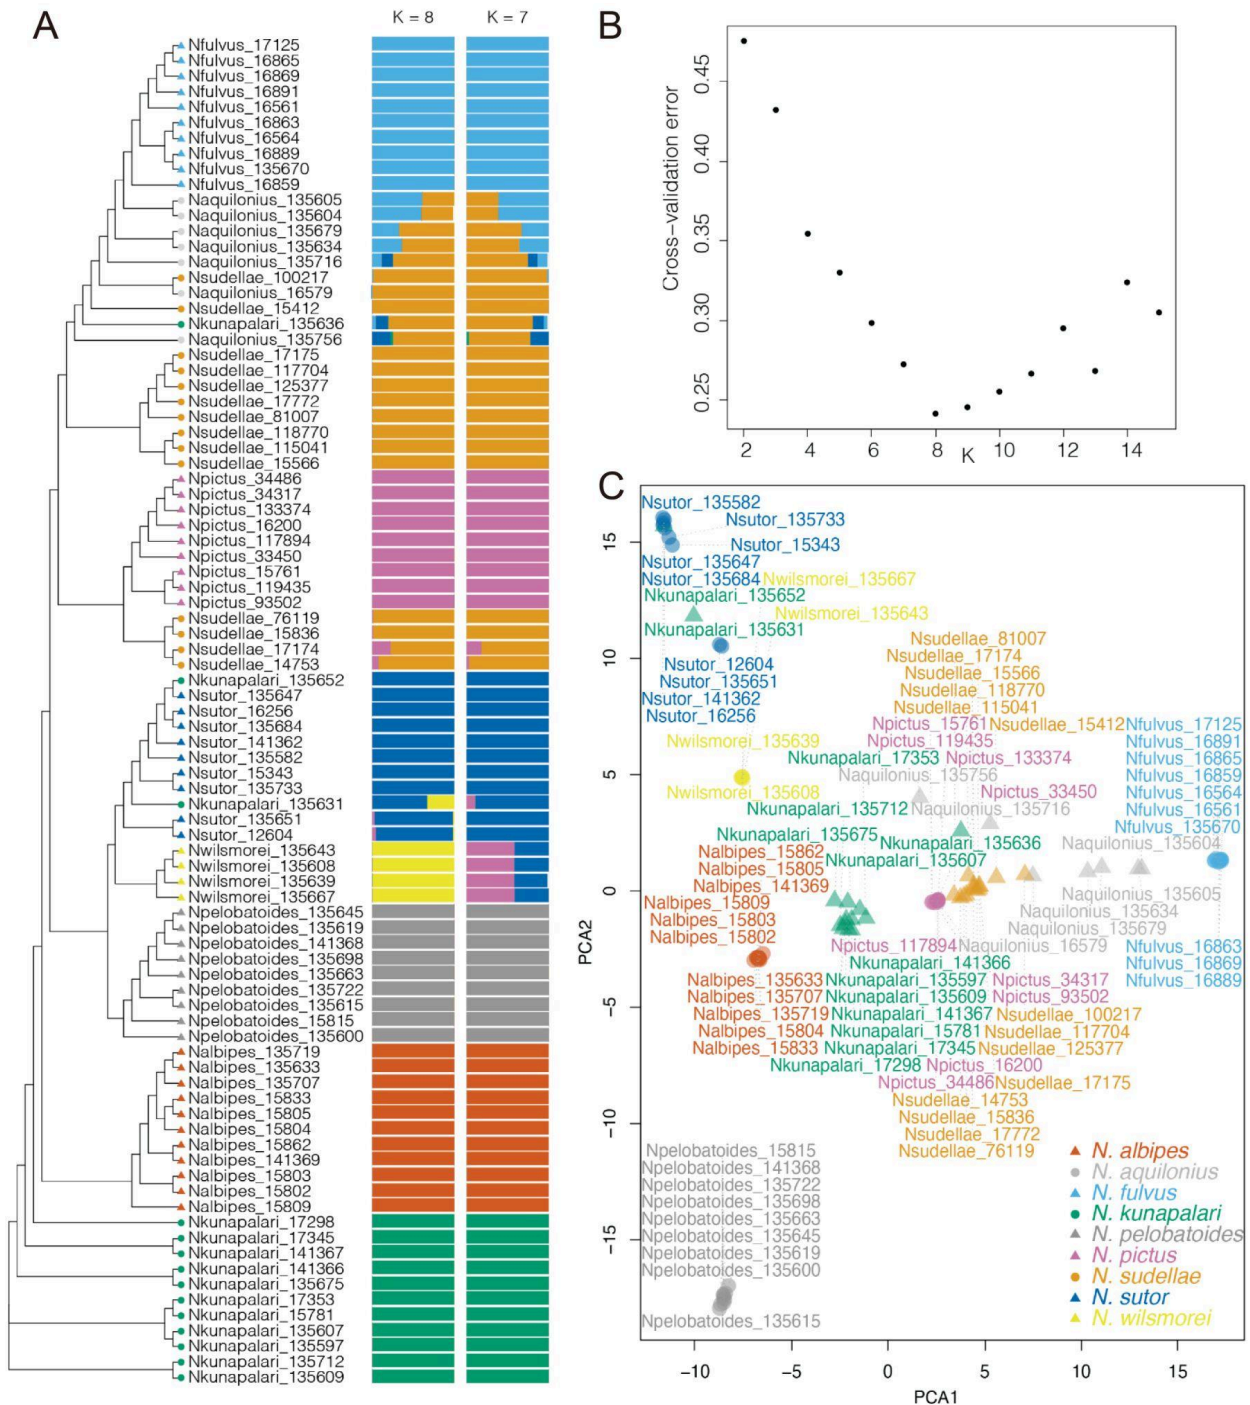

**Supplementary Figure 2. A.** Unrooted Neighbour-joining tree of neutral (4fds) sites, accompanied by admixture results for K=8 and K=7 . **B.** Cross Validation error for ADMIXTURE results amount of clusters (K) between 2 and 14. **C.** Principal component analysis of variation on 4fds. Tetraploid individuals are circles, diploid individuals are triangles.

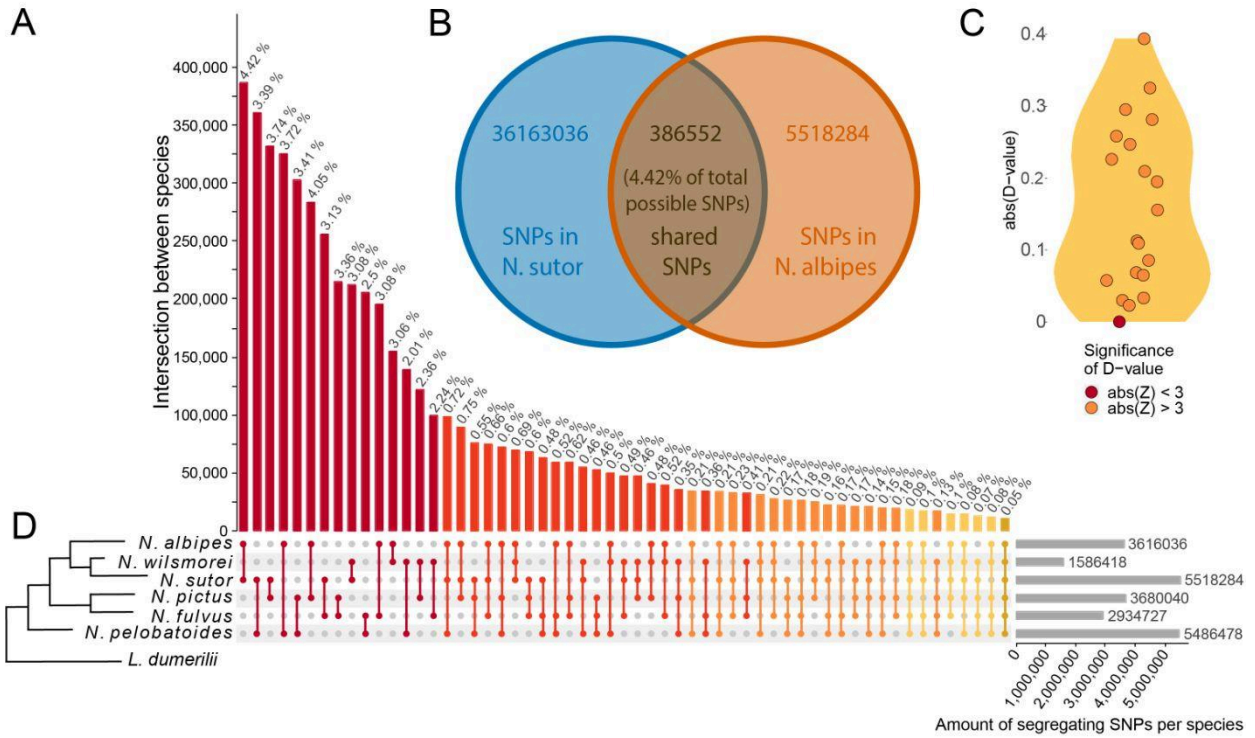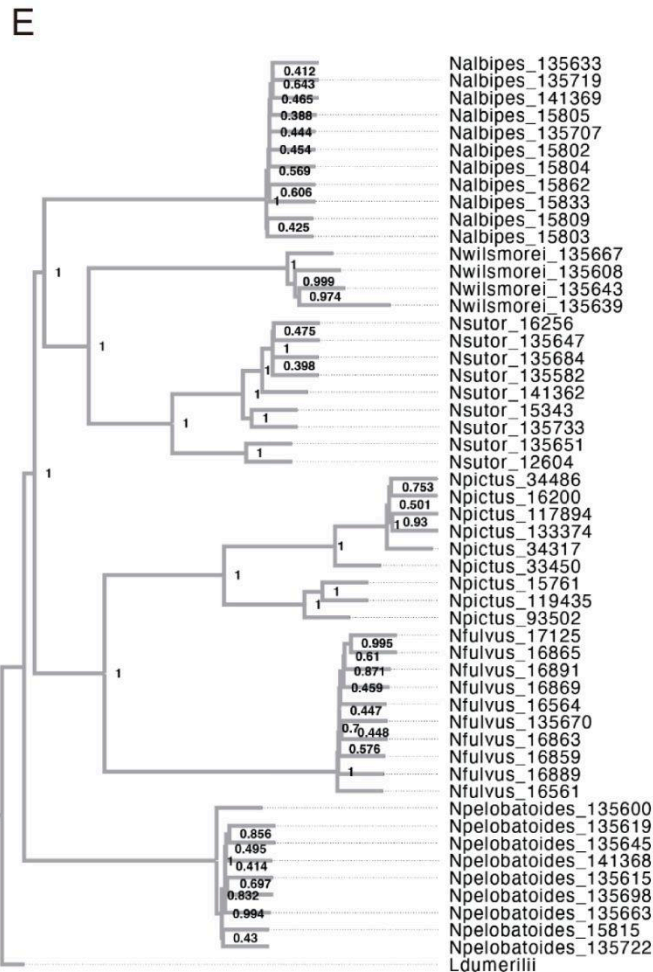

**Supplementary Figure 3.** **A.** UpSet plot showing the number of shared biallelic single nucleotide polymorphisms (SNPs) between diploid *Neobatrachus* species. The color from dark red to light orange indicates the number of species sharing SNPs from two (dark red) to three, four, five, or all six (light orange) diploid species. Bars are ordered in descending order based on the number of shared SNPs (i.e., intersection region shown in B), and labeled with the percentage of shared SNPs out of the total SNPs (intersection/union) found in the compared species. The horizontal bar plot on the right shows the total number of biallelic SNPs present in each species. **B.** Venn diagram showing how shared SNPs (intersection) are identified in genic regions between a pair of species. The numbers shown here correspond to the first bar on the vertical barplot. **C.** D-statistics from ABBA-BABA analysis for the six diploid *Neobatrachus* species. Each possible combination in concordance with the species tree in Fig. 3F is reported. D-statistics are considered significant if the Z-score is greater than 3 or lower than -3. **D.** Tree topology of the diploid *Neobatrachus* species is shown on the left. The eastern banjo frog, *Limnodynastes dumerilii dumerilii*, was used as an outgroup. **E.** Consensus tree of 385 gene trees of all diploid *Neobatrachus* individuals and *Limnodynastes dumerilii*, based on the maximum number of quartet topologies in the gene trees, weighted by gene tree discordance, constructed using ASTER<sup>158</sup> (v1.15.2.3) and visualized using FigTree (v.1.4.4). Node labels indicate the percentage of quartets among the gene trees that agree with the branch. **F.** Densitree of 385 gene trees of all diploid *Neobatrachus* individuals and outgroup *Limnodynastes dumerilii*.

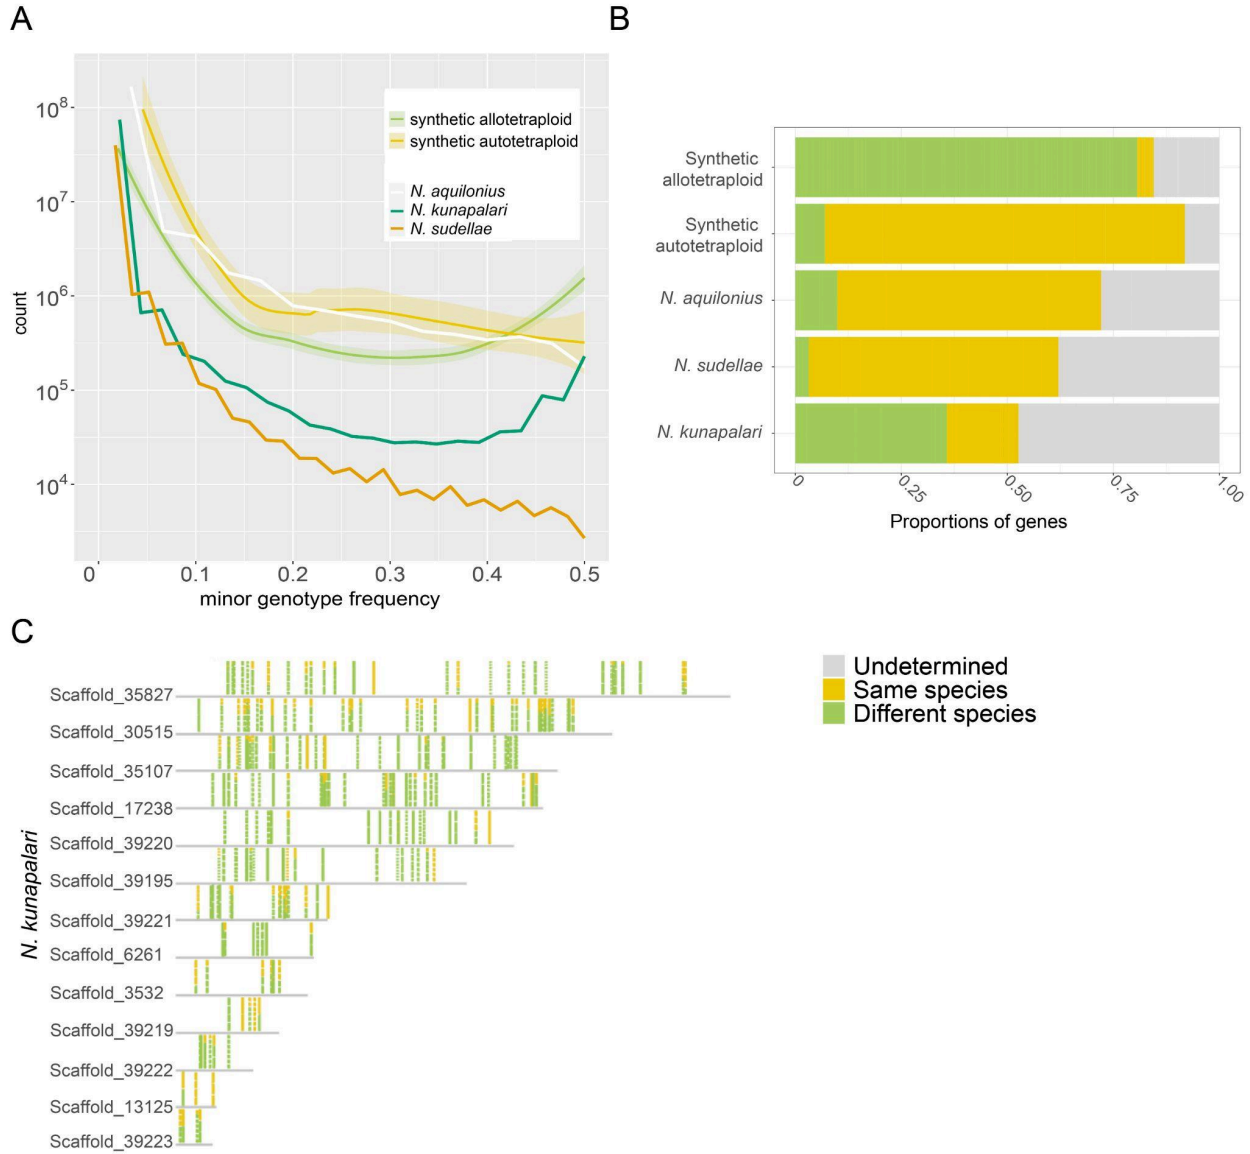

**Supplementary Figure 4. A.** Site frequency spectra of natural tetraploid *N. sudellae*, *N. aquilonius* and *N. kunapalari* in comparison with synthetic auto- and allotetraploids constructed *in silico* from the diploid species combinations. Synthetic allotetraploid populations exhibit a pronounced peak at intermediate frequency when mapped to a diploid reference due to fixed divergence between the diploid species, while autotetraploid populations do not. The shape of the site frequency spectra of the natural tetraploid *N. sudellae* and *N. aquilonius* resembles synthetic autotetraploids, while *N. kunapalari* shows an increase of minor genotype counts at 0.5 frequencies similar to synthetic allotetraploids. **B.** Overall phylogenetic assignment of natural and synthetic tetraploid pseudohaplotypes to the matching or discordant diploid species. **C.** Species-wide phylogenetic assignment of pseudohaplotypes of *N. kunapalari* to the matching (yellow) or discordant (green) diploid species along the genome. Each individual sample from *N. kunapalari* was assigned matching or discordant parental haplotypes, together forming a dotted bar at each locus. The dots correspond to an assignment of one individual at this locus. None of the longest scaffolds (chromosomes) are consistently assigned to matching (yellow) or discordants (green) parents,

suggesting that *N. kunapalari* has mixed inheritance mode and homeologs can recombine throughout the genome.

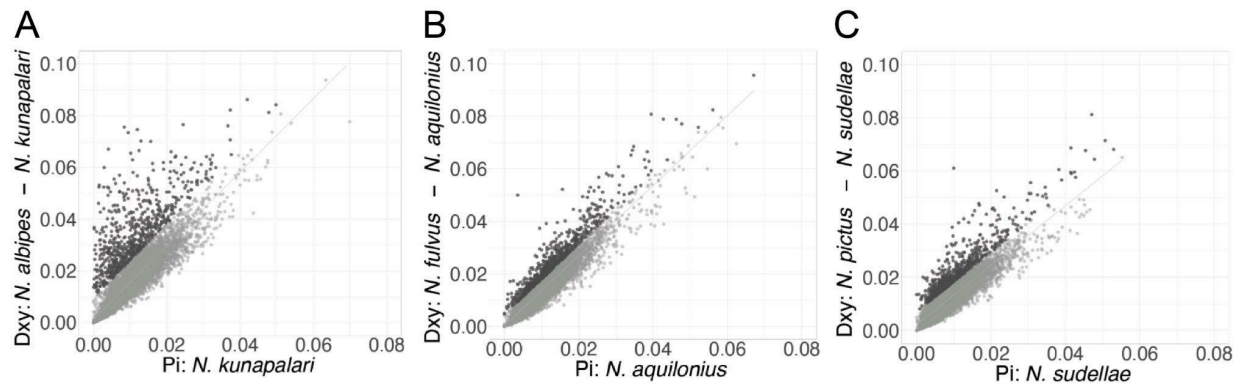

**Supplementary Figure 5.** Scatterplots showing the relationship between nucleotide diversity within tetraploid species and nucleotide divergence per diploid–tetraploid species pair per gene: (A) 2n *N. albipes* - 4n *N. kunapalari*; (B) 2n *N. fulvus* - 4n *N. aquilonius*; (C) 2n *N. pictus* - *N. sudellae*. The top 5% residual outliers from linear regression (gray line) are denoted in dark gray.

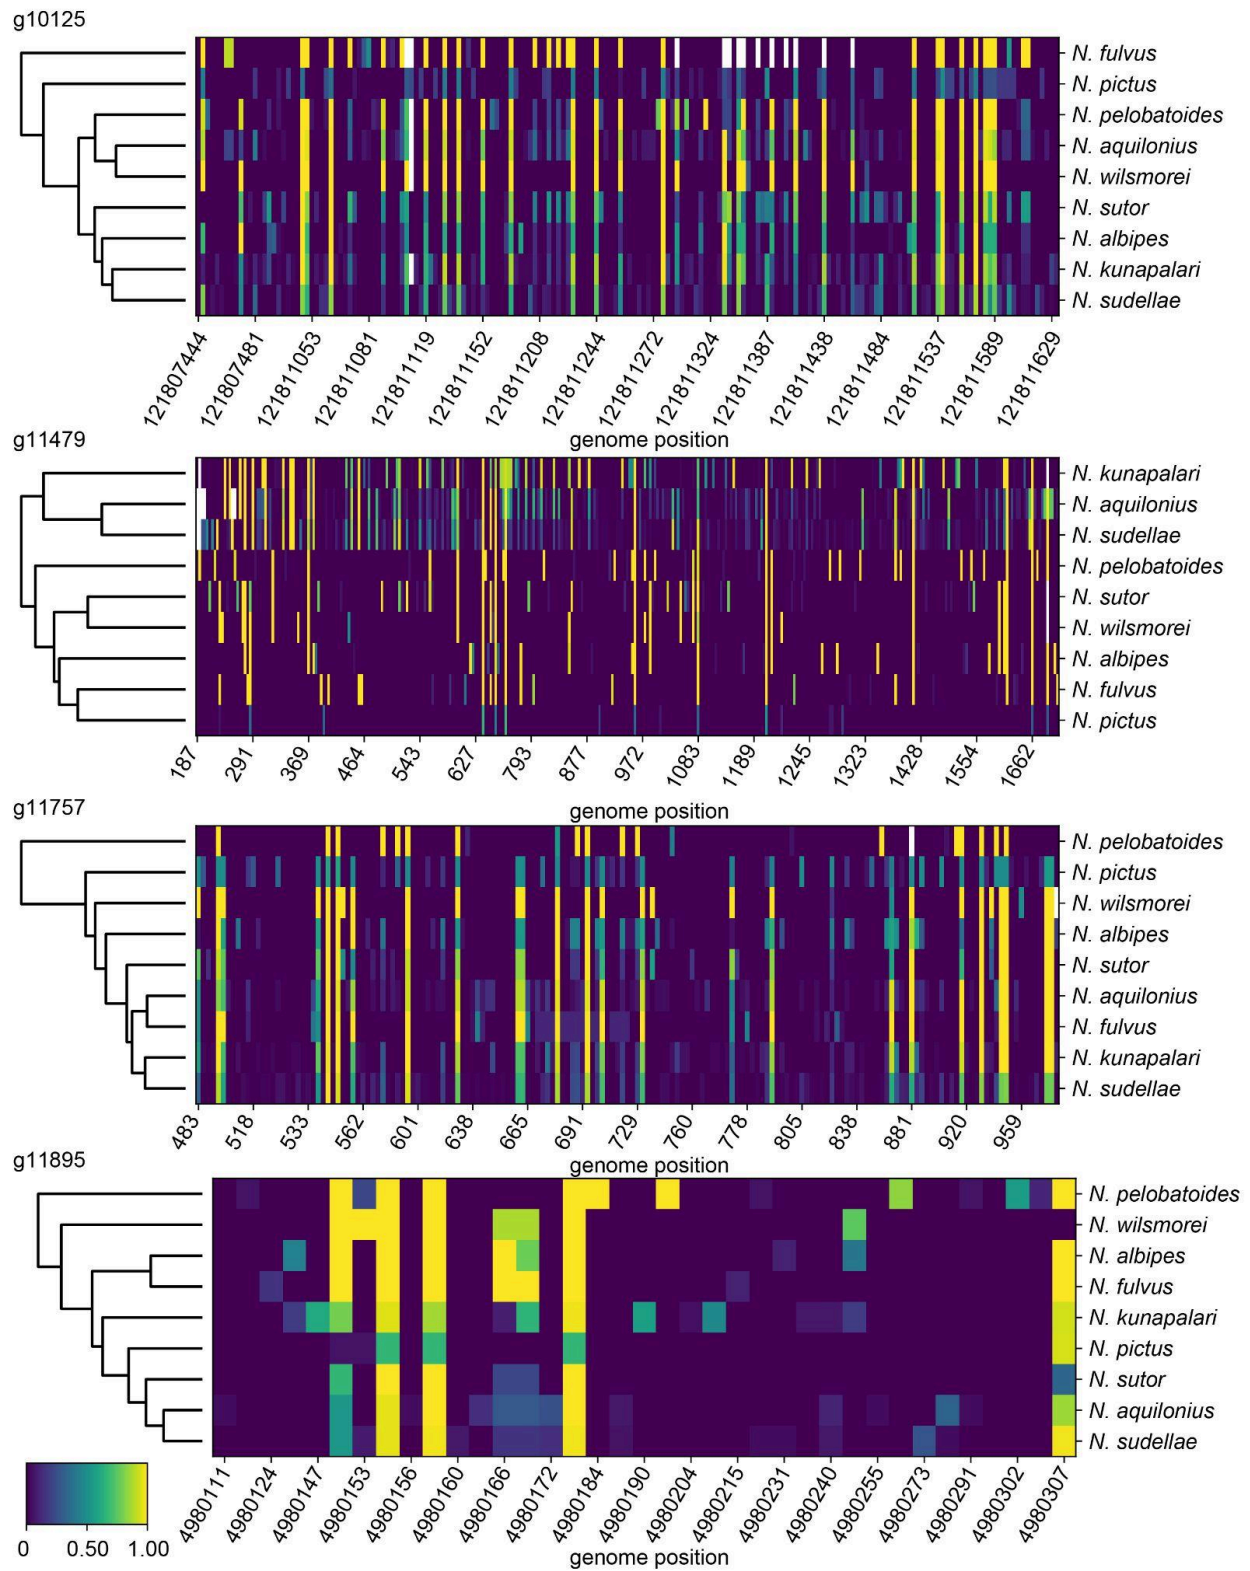

**Supplementary Figure 6:** Biallelic SNPs in CDS of genes under selection, colored and clustered by proportion of alternative allele per site per species (yellow: alternative allele is fixed in species; white: missing data in that species). [1-4 of 27]



g1430

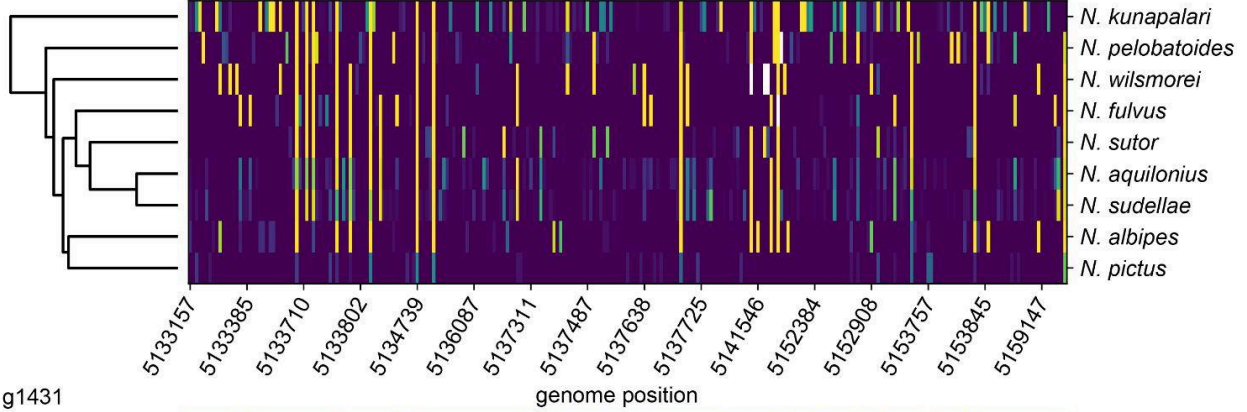

g1431

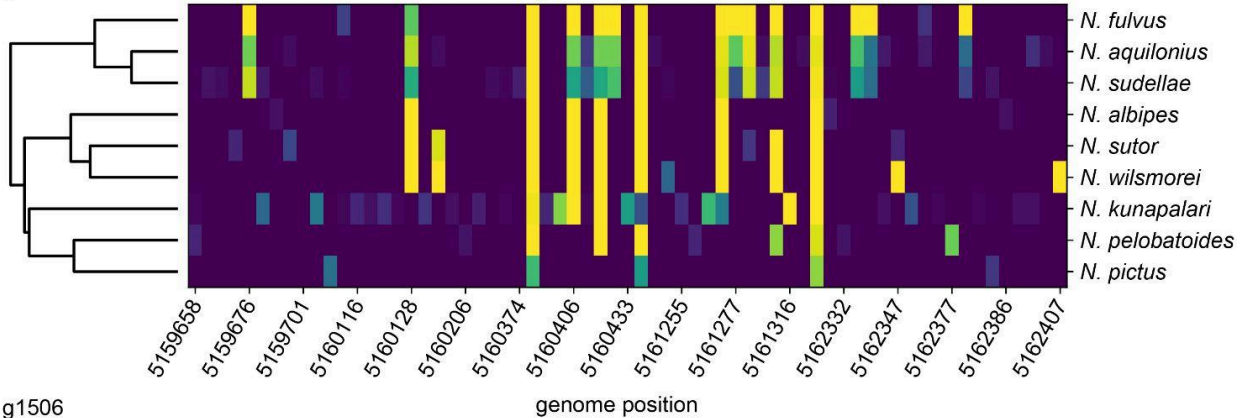

g1506

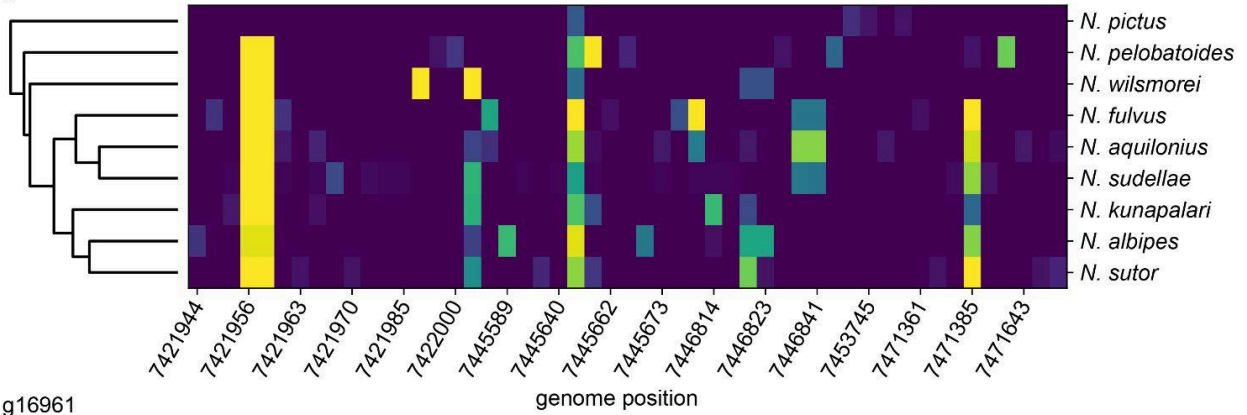

g16961

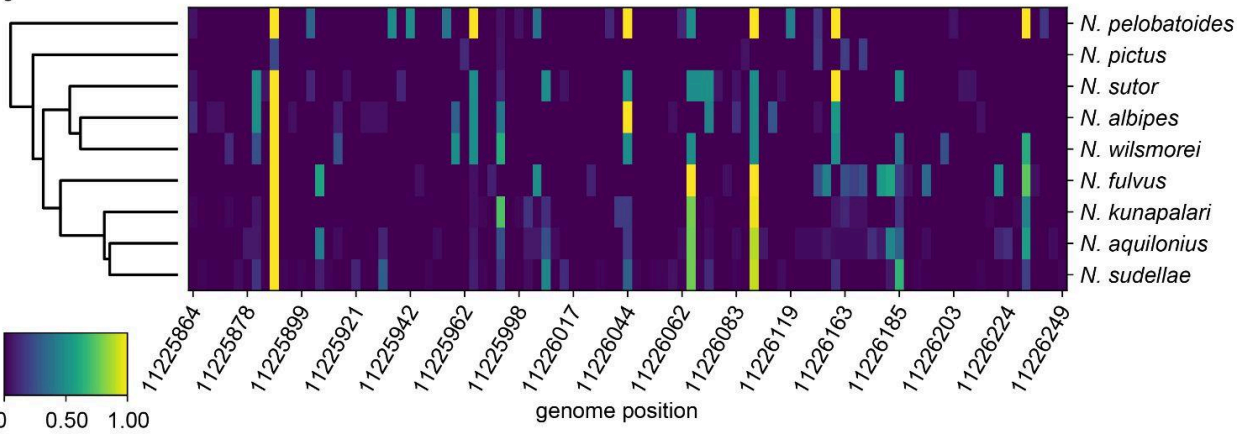

0 0.50 1.00

**Supplementary Figure 6 cont.:** Biallelic SNPs in CDS of genes under selection, colored and clustered by proportion of alternative allele per site per species (yellow: alternative allele is fixed; white: missing data in that species). [5-8 of 27]

g18887

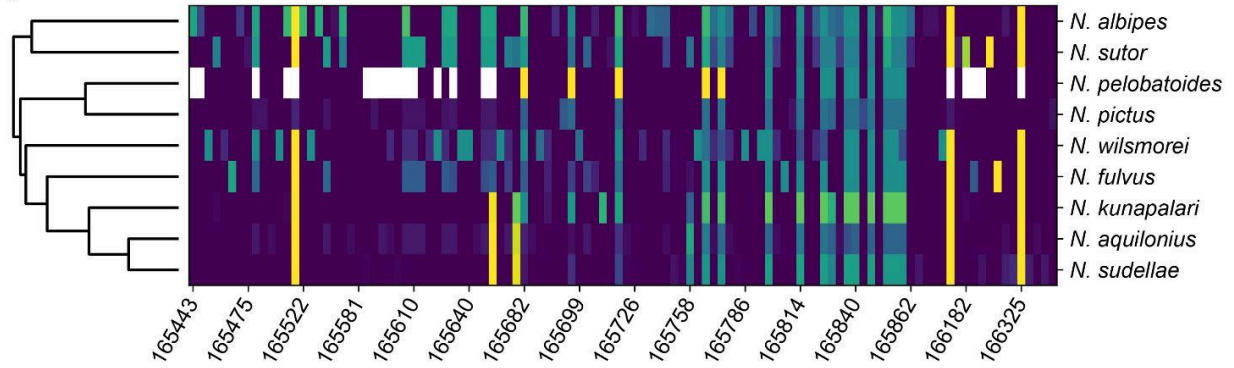

g22785

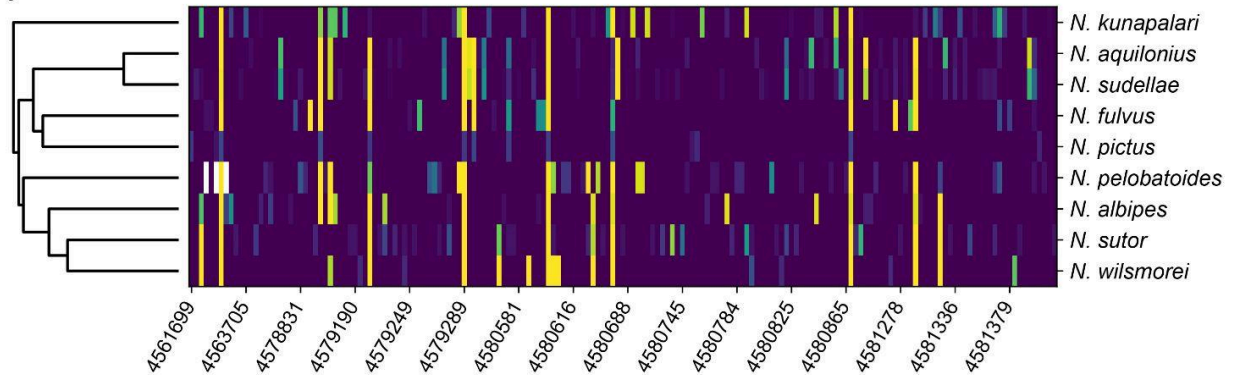

g23295

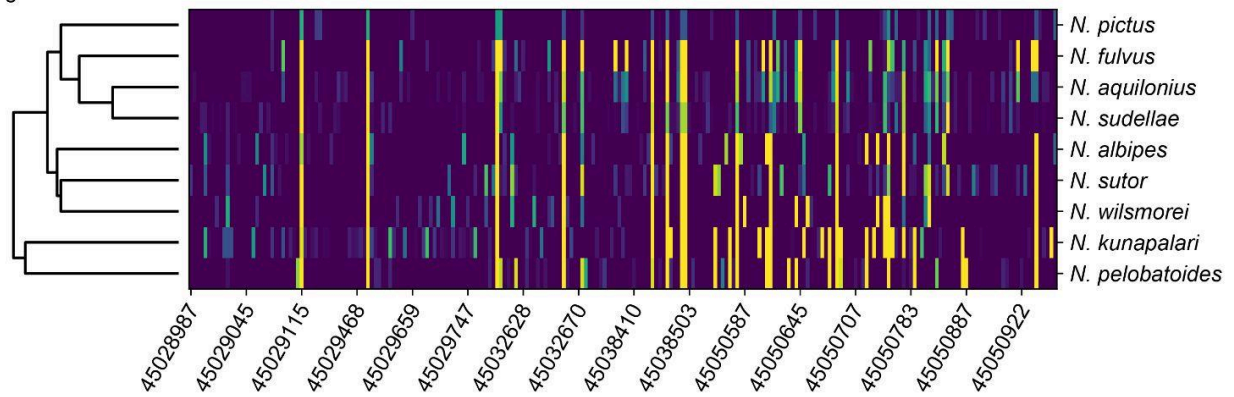

g23303

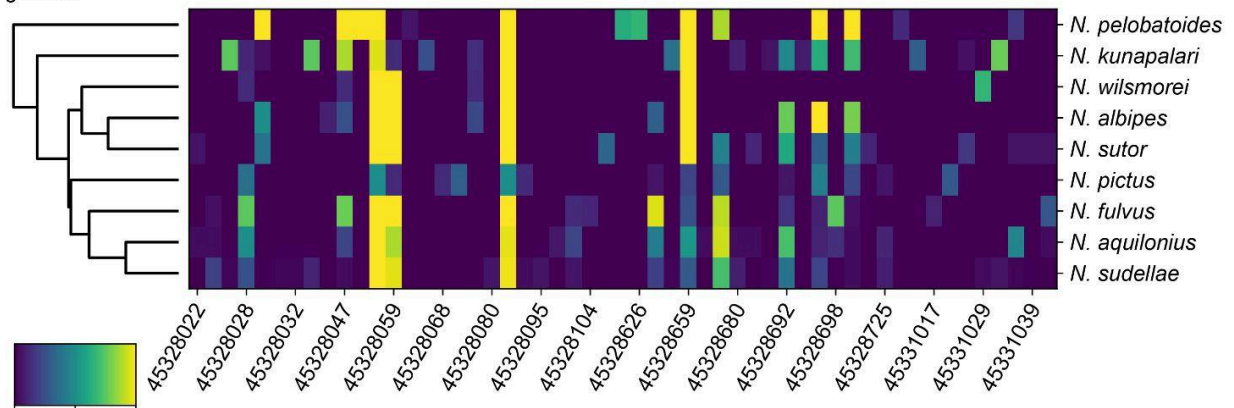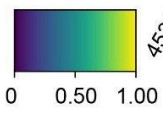

**Supplementary Figure 6 cont.:** Biallelic SNPs in CDS of genes under selection, colored and clustered by proportion of alternative allele per site per species (yellow: alternative allele is fixed; white: missing data in that species). [9-12 of 27]

g23322

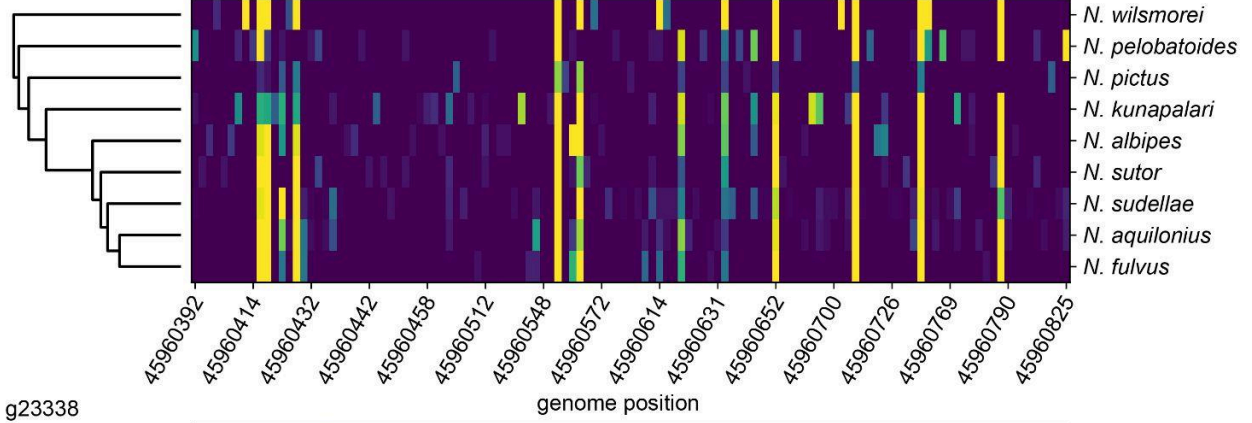

g23338

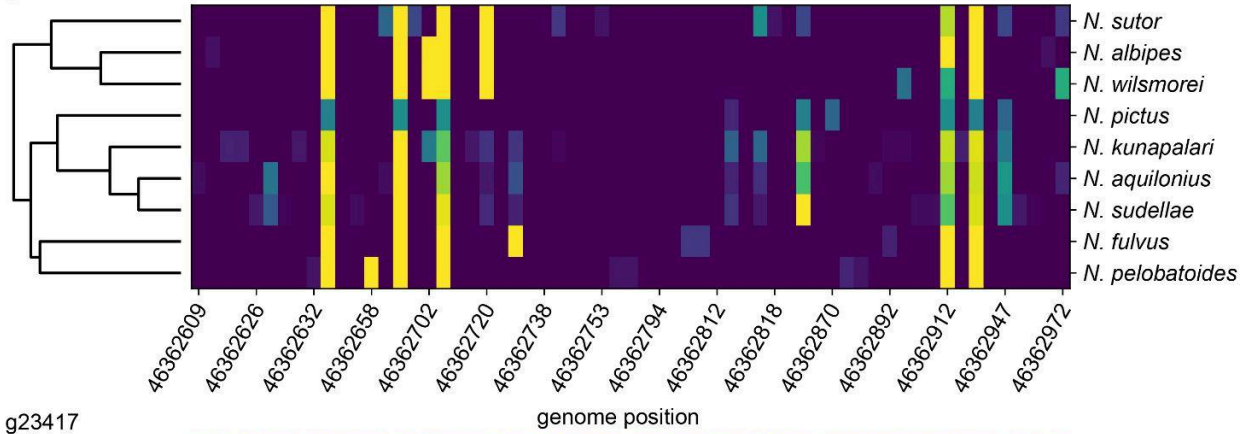

g23417

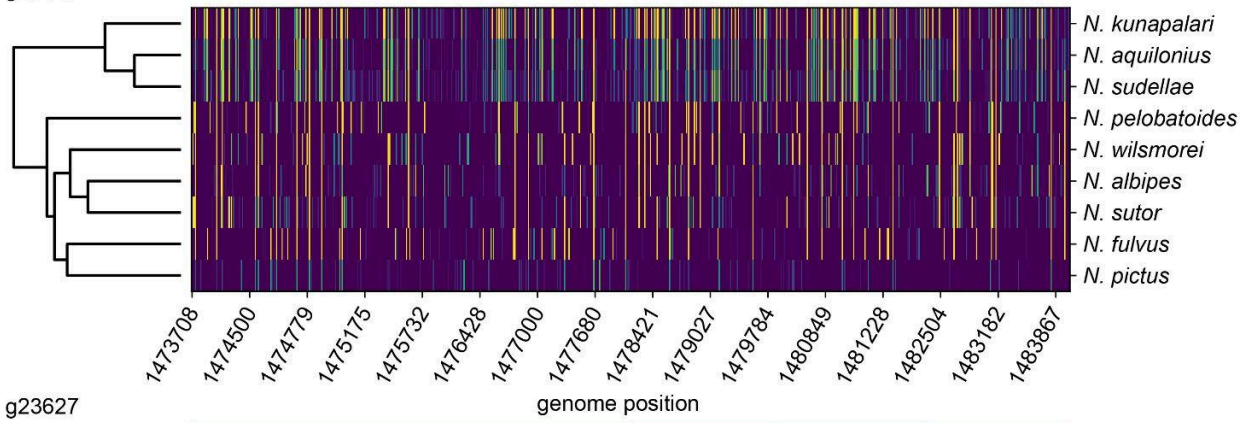

g23627

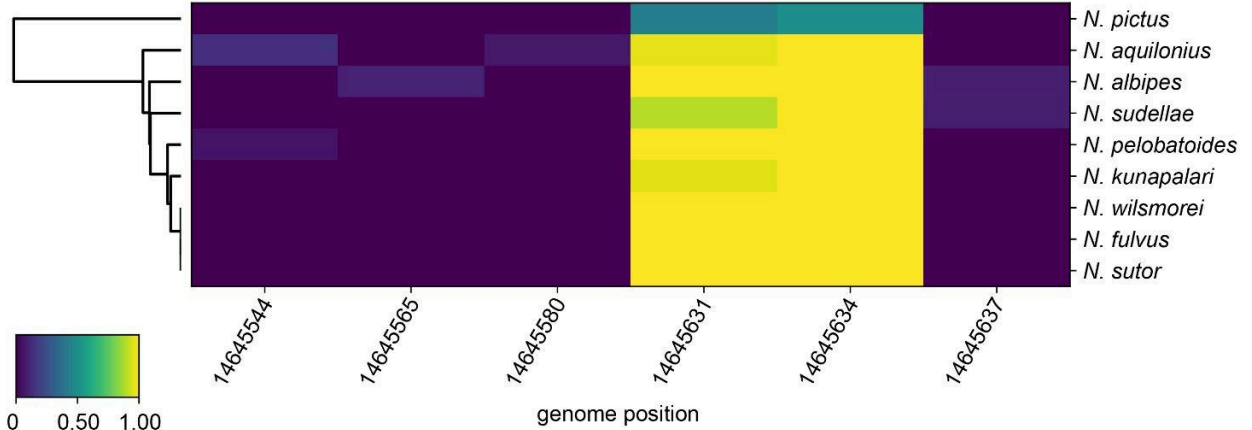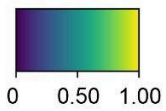

**Supplementary Figure 6 cont.:** Biallelic SNPs in CDS of genes under selection, colored and clustered by proportion of alternative allele per site per species (yellow: alternative allele is fixed; white: missing data in that species). [13-16 of 27]

g2400

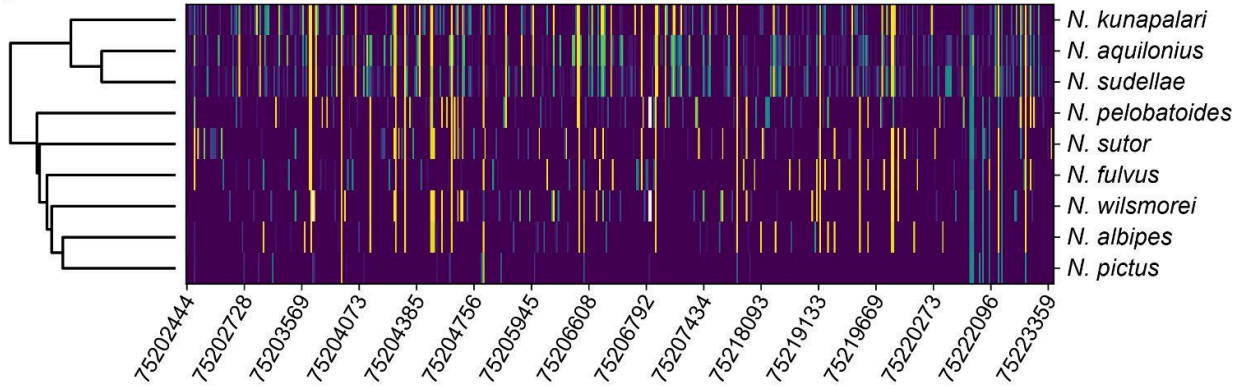

g3616

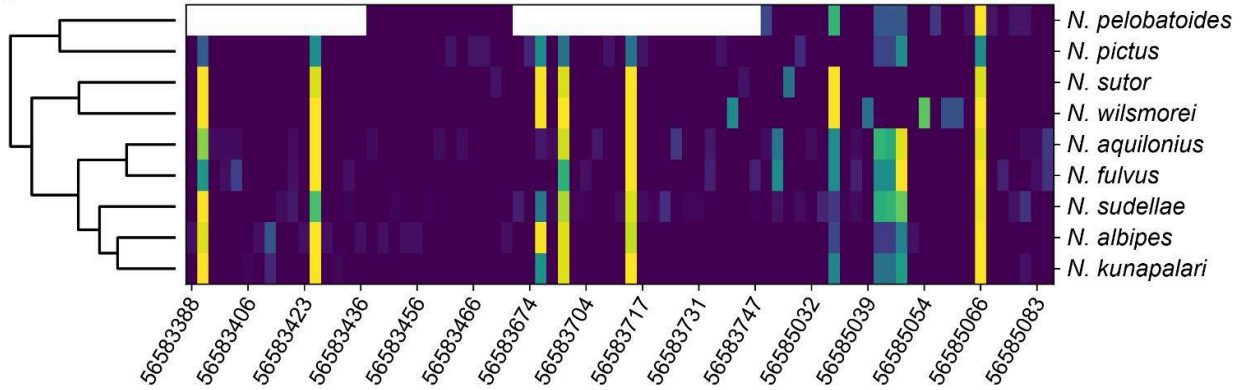

g5068

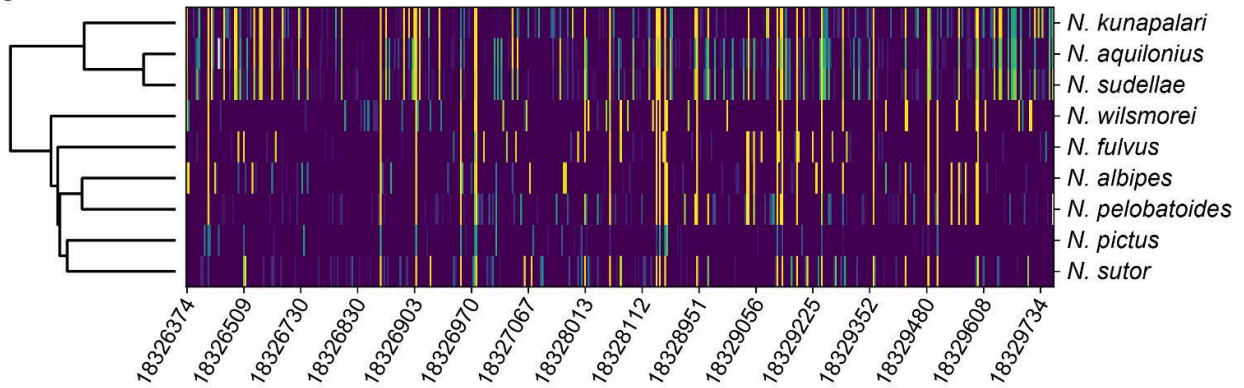

g5622

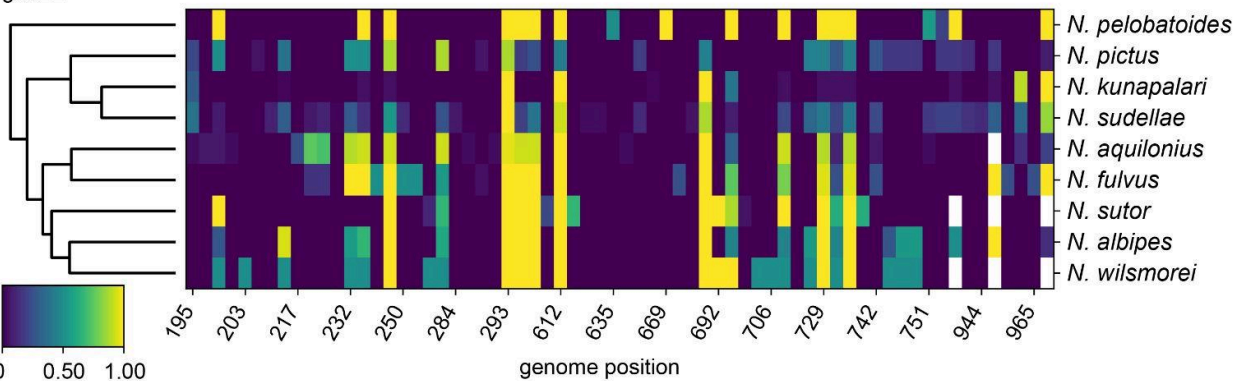

**Supplementary Figure 6 cont.:** Biallelic SNPs in CDS of genes under selection, colored and clustered by proportion of alternative allele per site per species (yellow: alternative allele is fixed; white: missing data in that species). [17-20 of 27]

g5727

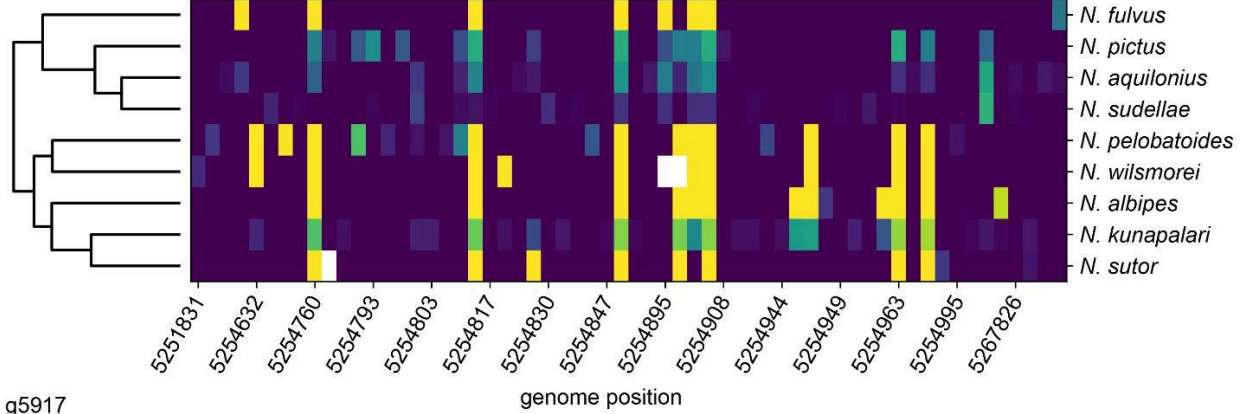

g5917

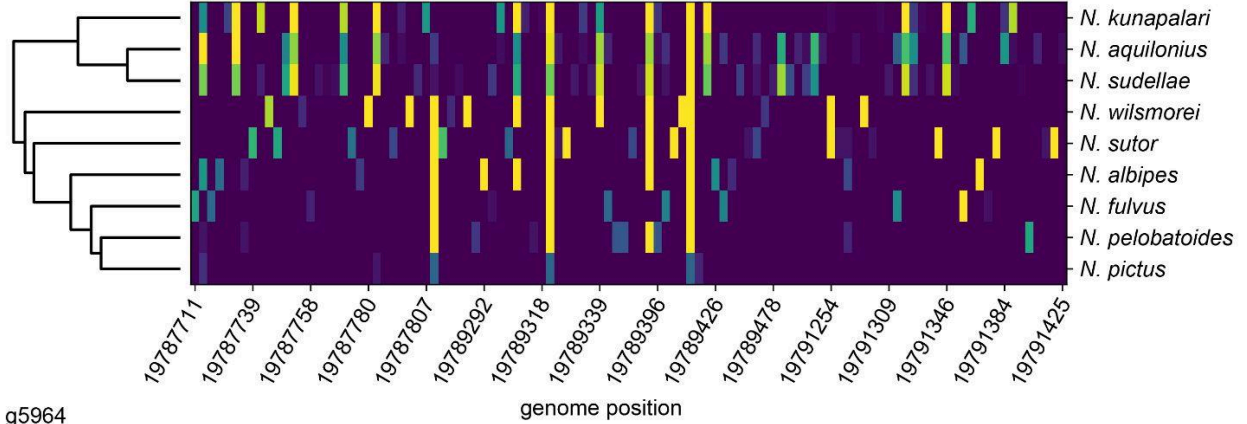

g5964

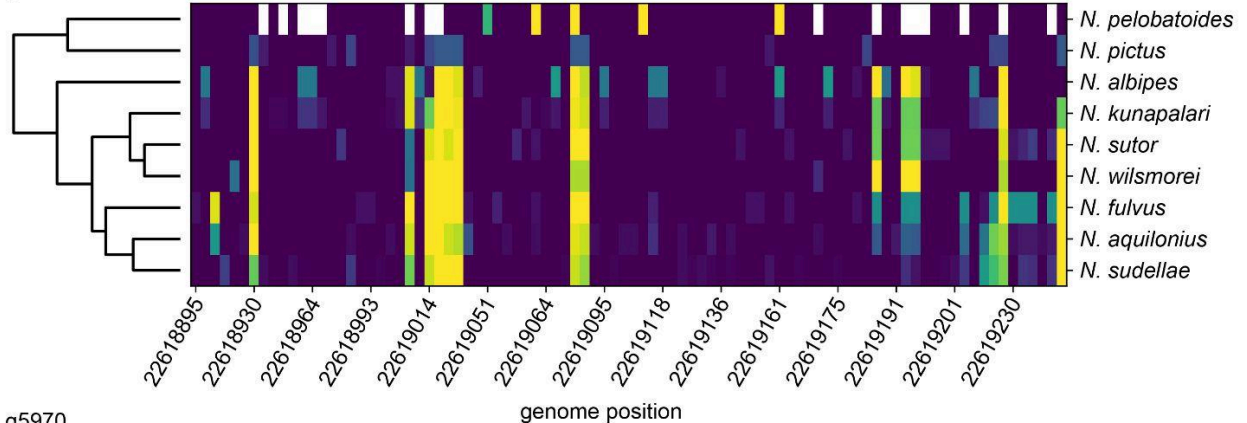

g5970

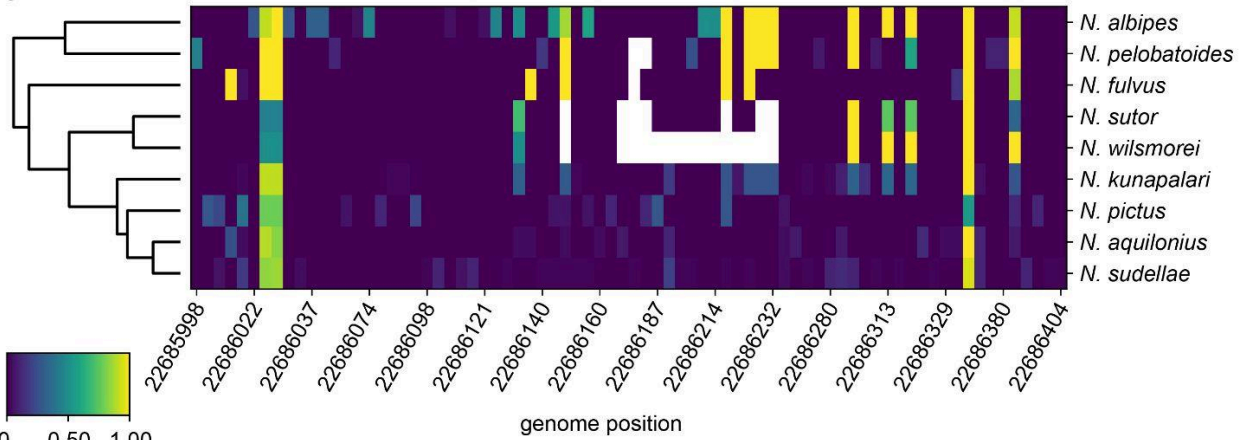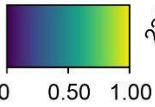

**Supplementary Figure 6 cont.:** Biallelic SNPs in CDS of genes under selection, colored and clustered by proportion of alternative allele per site per species (yellow: alternative allele is fixed; white: missing data in that species). [21-24 of 27]

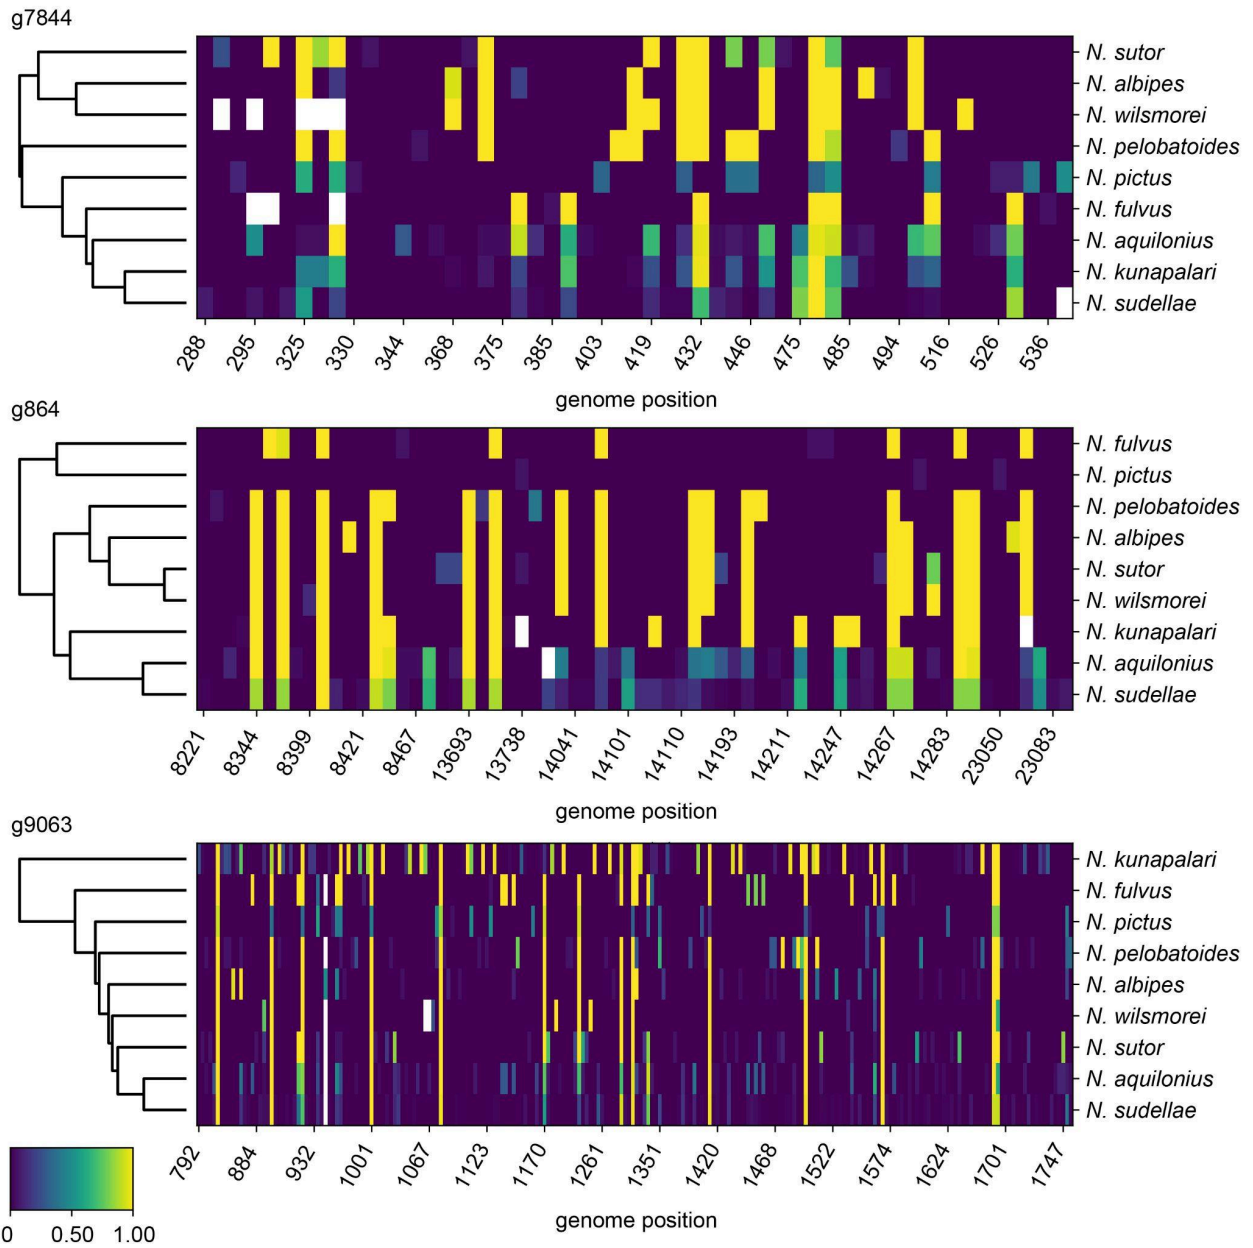

**Supplementary Figure 6 cont.:** Biallelic SNPs in CDS of genes under selection, colored and clustered by proportion of alternative allele per site per species (yellow: alternative allele is fixed; white: missing data in that species). [25-27 of 27]

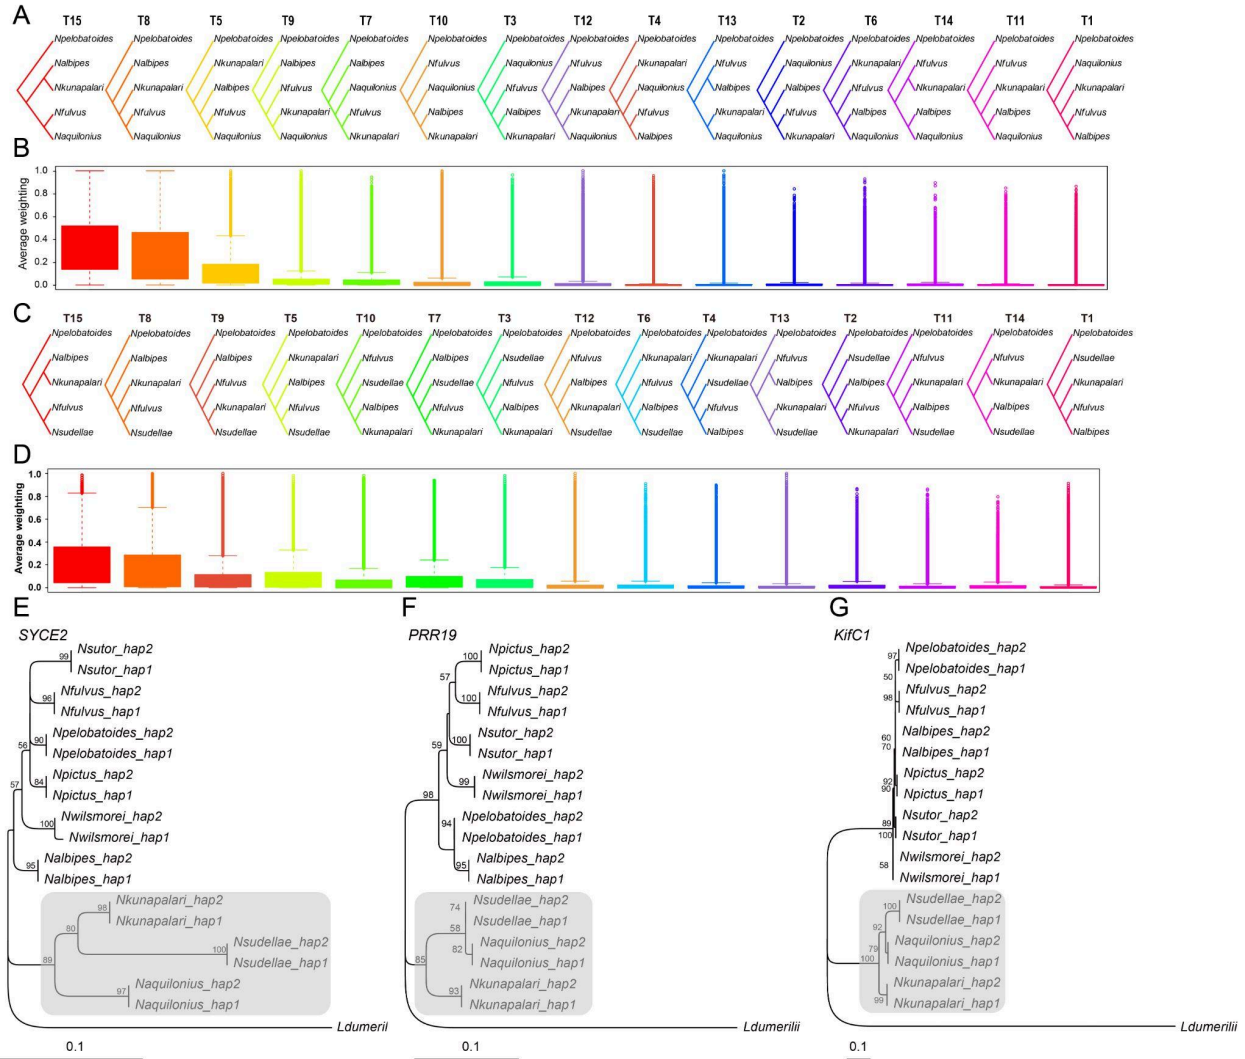

**Supplementary Figure 7.:** Topologies scans among tetraploids and candidate-gene phylogenies based on true haplotypes. A, C, The 15 possible rooted topologies for the two five-taxon datasets used in topology weighting analyses, with *N. pelobatooides* as the outgroup. The first dataset examines tetraploid relationships involving *N. kunapalari* and *N. aquilonius* (A), and the second examines relationships involving *N. kunapalari* and *N. sudellae* (C). B, D, Boxplots showing the genome-wide distribution of topology weighting for each topology shown in A and C, respectively. Introgression topologies 9, 12, and 13 showed the strongest support and were therefore summed in downstream analyses (Fig. 3F, G) to represent introgression phylogenetic signals among tetraploids. E–G, True haplotype gene trees for *SYCE2*, *PRR19*, and *KifC1*, reconstructed from 18 linked-read genome assemblies representing six diploid and three tetraploid species. The grey shaded boxes highlight the clade containing the three tetraploid species.
